# Supplementary material for: A Critical Appraisal of Quantitative Studies of Protein Degradation in the Framework of Cellular Proteostasis
Source: Hindawi journal article supplement (doi:10.1155/2012/823597), 2012-01-01
Supplement: f1 [file 823597.f1.xls]

## Sheet: INTRODUCTTION
		mRNA and protein decay
		Next spreadsheet shows a mathematical simulation of RNA and protein decay.
		The cells that require numerical input data from the user are in yellow background
		Do not modify white background cells; they are required for the calculus.
		Values to be introduced by the user:
		mRNAo = Introduce the initial number of molecules of the mRNA per cell.
		protein synthesis rate= Introduce the rate of protein synthesized per hour
		Proteino = Initial number of protein molecules calculated from the previous values taht have been introduced.
		mRNA t1/2= Introduce the mRNA half-life in hours.
		protein t1/2= Introduce the mRNA half-life in hours.
		TCC= Introduce the Time of Cell division Cycle in hours
		Below you have the equations used for the simulation
		dM(t)/dt = - k M(t) (mRNA decay)
		dP(t)/dt = M(t)*R - P(t)*(D+V) (protein decay due to mRNA and protein decay taking also into account cell division cycle)
		Solution (for k ≠ D+V)
		M(t) = M(0) exp{-kt}
		P(t) = (P(0)- R*M(0)/(D+V-k)) exp{-(D+V)t} + (R*M(0)/(D+V-k)) exp{-kt}
		The plots (direct and log) show the decay of protein in the cell in two situations
		1) in the presence of protein synthesis inhibitor. OPEN symbols
		2) due to shut-off of of RNA transcription. RED symbols
		The additional curve with blue symbols shows the decay of mRNA once transcription shut-off is started at time 0.
		Note that when the half-life of the protein is shorter
		than mRNA half-life, the protein decay by transcriptional
		shut-off experiments (red symbols curve) is governed
		by the mRNA decay (blue symbols)
		and gives an overestimate of protein half-life,
		bigger than the actual half-life of the protein
		determined by treatment of cells with
		protein synthesis inhibition (open symbols).

## Sheet: mRNA and protein decay
				mRNAo =	100		protein synthesis rate=	20	molecules per hour	Proteino =	21499.1		mRNA t1/2=	20	time (h)
											10749.5
Time	RNA	Protein + inh protein synthesis	Protein chnage with mRNA decay	M constant			Plot of number of molecules remaining in the cell						protein t1/2=	12	time (h)
0	100	21499.1	21499.1	21499.1
1	96.5936	20292.4	21465.9	21499.1
2	93.3033	19153.5	21371.7	21499.1									V	0.0352649
3	90.125	18078.5	21224.1	21499.1									TCC	20	time (h)
4	87.0551	17063.8	21030	21499.1
5	84.0896	16106.1	20795.5	21499.1									D (protein)	0.0577623
6	81.2252	15202.2	20526.2	21499.1									k (mRNA)	0.0346574
7	78.4584	14348.9	20227.1	21499.1
8	75.7858	13543.6	19902.7	21499.1
9	73.2043	12783.4	19556.8	21499.1									Mathematical Model
10	70.7107	12066	19193.3	21499.1									dM(t)/dt = - k M(t)
11	68.302	11388.7	18815.3	21499.1									dP(t)/dt = M(t)*R - P(t)*(D+V)
12	65.9754	10749.5	18425.6	21499.1									Solution (for k ≠ D+V)
13	63.728	10146.2	18026.9	21499.1									M(t) = M(0) exp{-kt}
14	61.5572	9576.76	17621.5	21499.1									P(t) = (P(0)- R*M(0)/(D+V-k)) exp{-(D+V)t} + (R*M(0)/(D+V-k)) exp{-kt}
15	59.4604	9039.25	17211.3	21499.1
16	57.4349	8531.92	16798.2	21499.1
17	55.4785	8053.06	16383.8	21499.1
18	53.5887	7601.08	15969.5	21499.1
19	51.7632	7174.46	15556.6	21499.1			Log Plot of number of molecules remaining in the cell
20	50	6771.79	15146	21499.1
21	48.2968	6391.72	14738.9	21499.1
22	46.6516	6032.98	14335.9	21499.1
23	45.0625	5694.37	13937.9	21499.1
24	43.5275	5374.77	13545.4	21499.1
25	42.0448	5073.11	13159	21499.1
26	40.6126	4788.38	12779.1	21499.1
27	39.2292	4519.63	12406	21499.1
28	37.8929	4265.96	12040.1	21499.1
29	36.6021	4026.53	11681.7	21499.1
30	35.3553	3800.54	11330.8	21499.1
31	34.151	3587.23	10987.8	21499.1
32	32.9877	3385.89	10652.6	21499.1
33	31.864	3195.86	10325.3	21499.1
34	30.7786	3016.49	10006.1	21499.1
35	29.7302	2847.19	9694.81	21499.1
36	28.7175	2687.39	9391.51	21499.1
37	27.7392	2536.55	9096.16	21499.1
38	26.7943	2394.19	8808.68	21499.1
39	25.8816	2259.81	8529.01	21499.1
40	25	2132.98	8257.05	21499.1
50	17.6777	1197.09	5935.24	21499.1
60	12.5	671.847	4234.96	21499.1
80	6.25	211.618	2134.04	21499.1
90	4.41942	118.767	1511.33	21499.1
100	3.125	66.6556	1069.59	21499.1
150	0.552427	3.71146	189.274	21499.1
